# Supplementary material for: Fluorescence “Turn-Off” and Colorimetric Sensor for Fe2+, Fe3+, and Cu2+ Ions Based on a 2,5,7-Triarylimidazopyridine Scaffold
Source: PubMed Central journal article supplement — ACS Omega. 2022 Mar 22;7(13):11114–25. doi: 10.1021/acsomega.1c07193 (PMC8991908; doi:10.1021/acsomega.1c07193), 2022-03-22
Supplement: ao1c07193_si_001.pdf [file ao1c07193_si_001.pdf]

**Fluorescence “Turn-Off” and Colorimetric Sensor for Fe<sup>2+</sup>, Fe<sup>3+</sup>, and Cu<sup>2+</sup> Ions Based on a 2,5,7-Triarylimidazopyridine Scaffold.**

Sonakshi Sasan<sup>†,§</sup>, Tavishi Chopra<sup>‡,§</sup>, Annah Gupta<sup>†</sup>, Dolma Tsering<sup>†</sup>, Kamal K. Kapoor<sup>\*,†</sup> and Raman Parkesh<sup>\*,‡</sup>

<sup>†</sup>Department of Chemistry, University of Jammu, Jammu, 180006, India

<sup>‡</sup>CSIR-Institute of Microbial Technology, Chandigarh, 160036, India

\*E-mail: kamalkka@gmail.com.

\*E-mail: rparkesh@imtech.res.in.

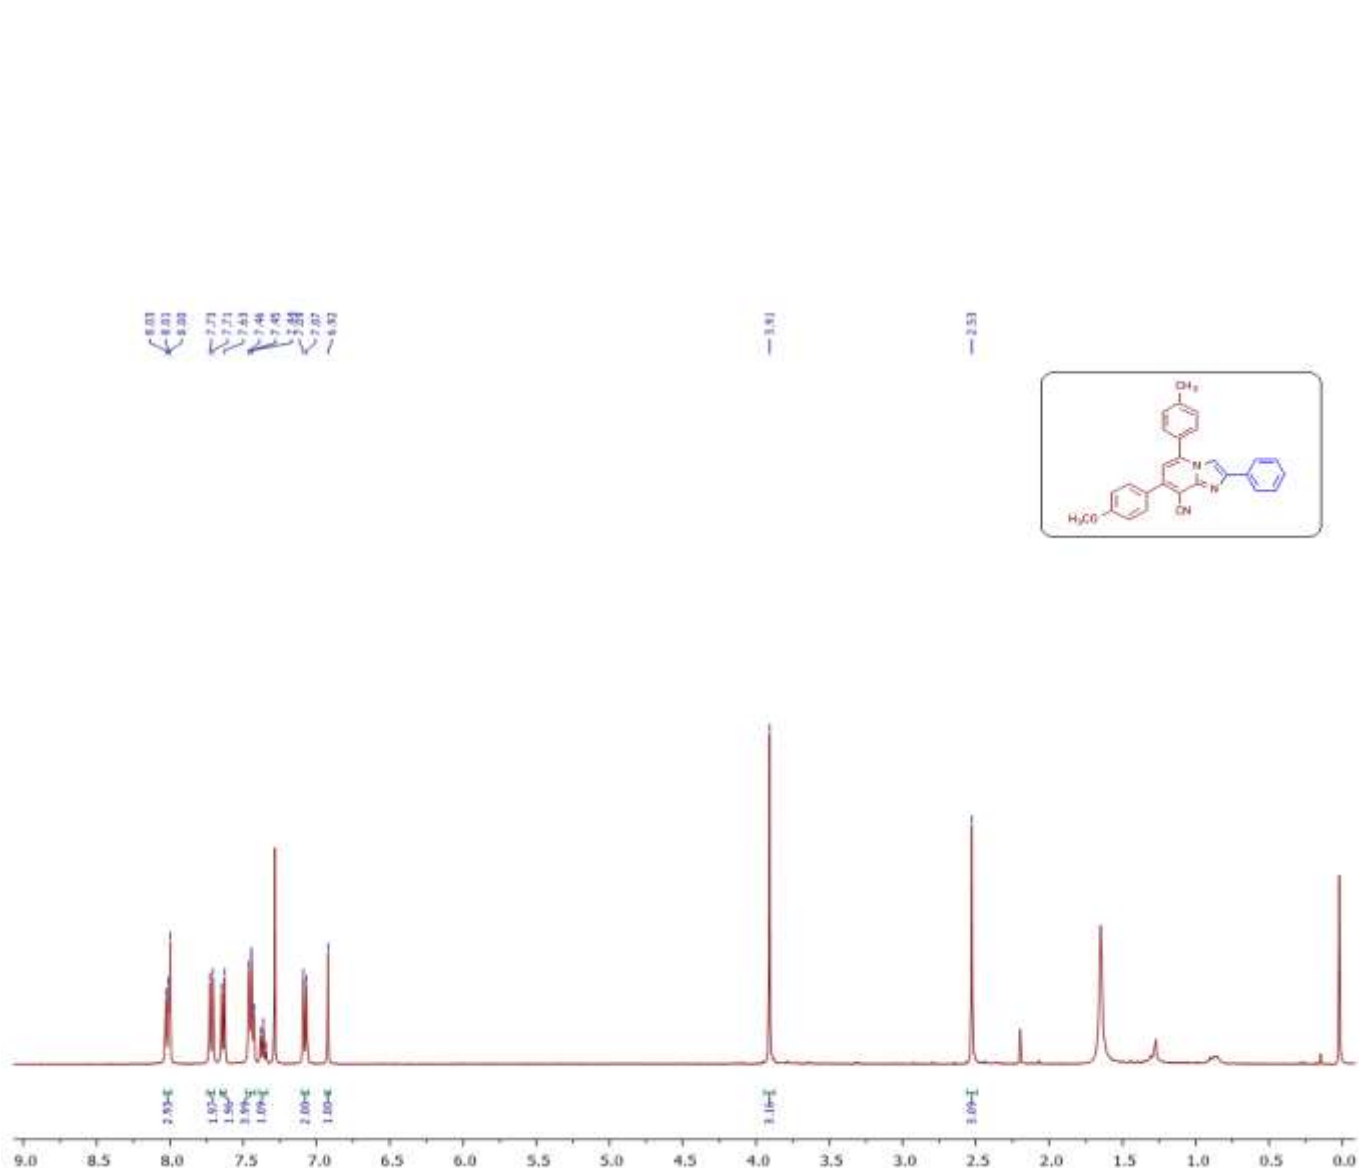

**Figure S1:** <sup>1</sup>H NMR of SS1.

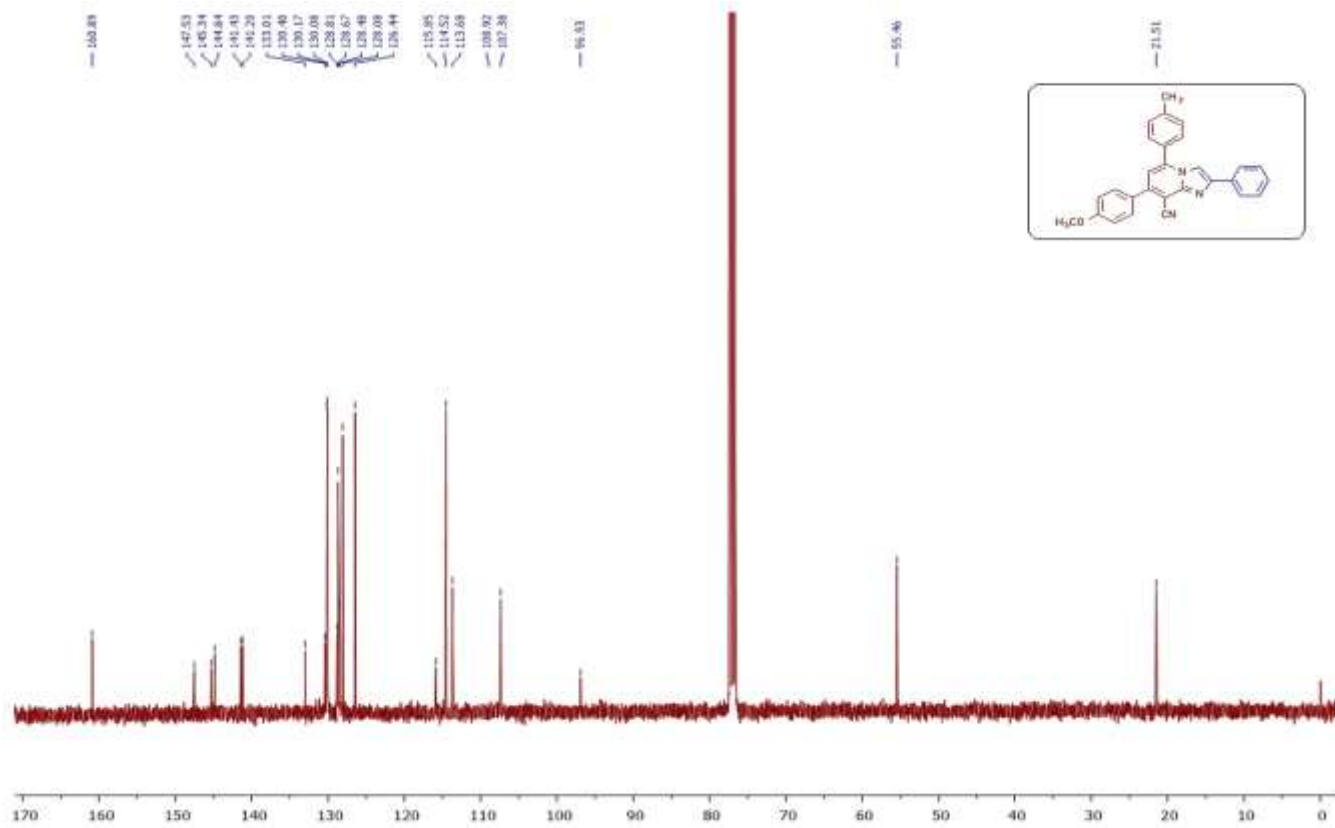

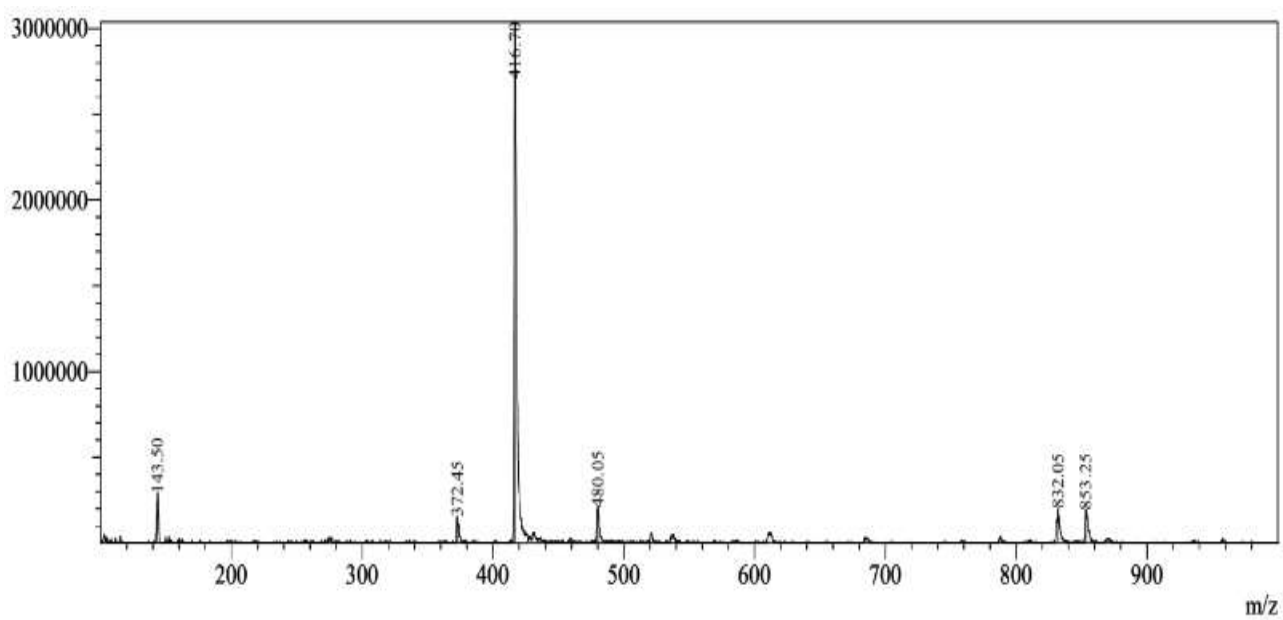

**Figure S3: Mass spectra of SS1.**

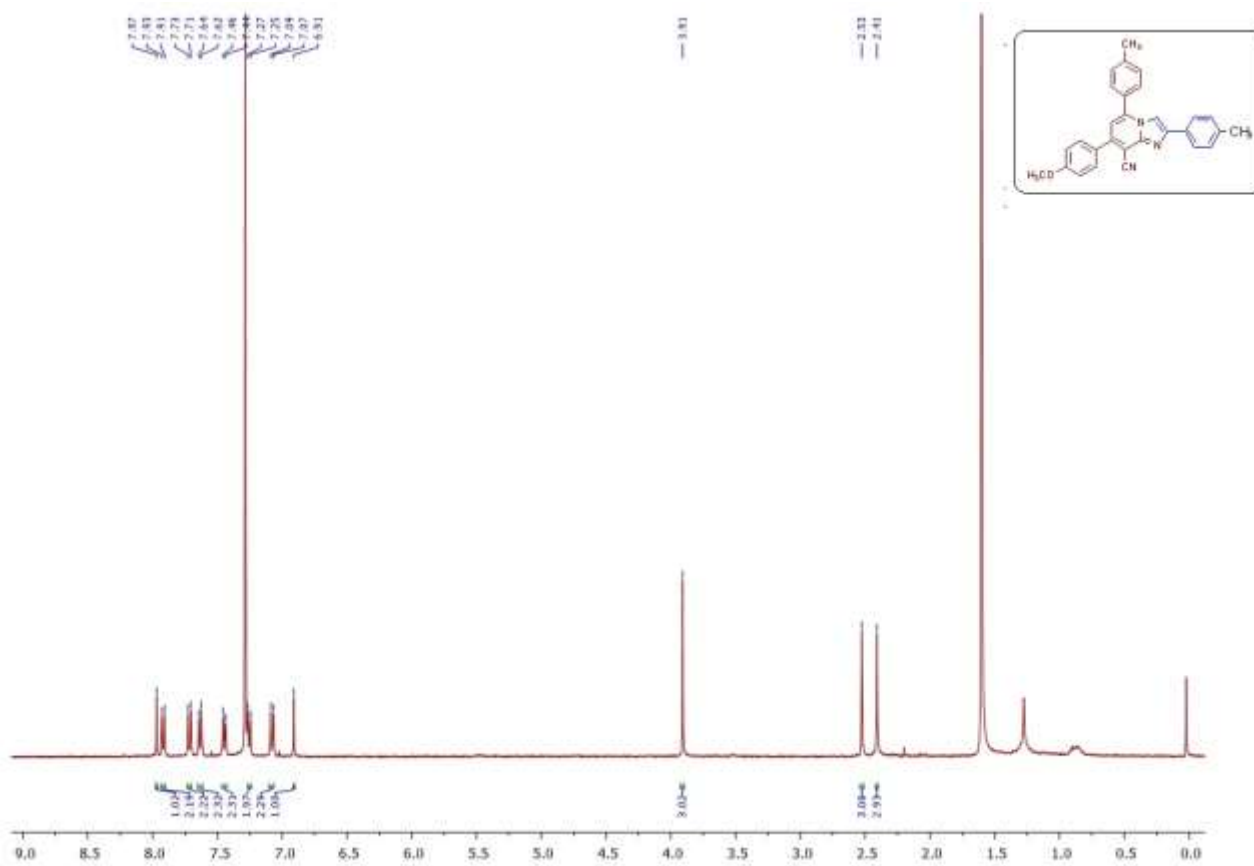

Figure S4:  $^1\text{H}$  NMR of SS2.

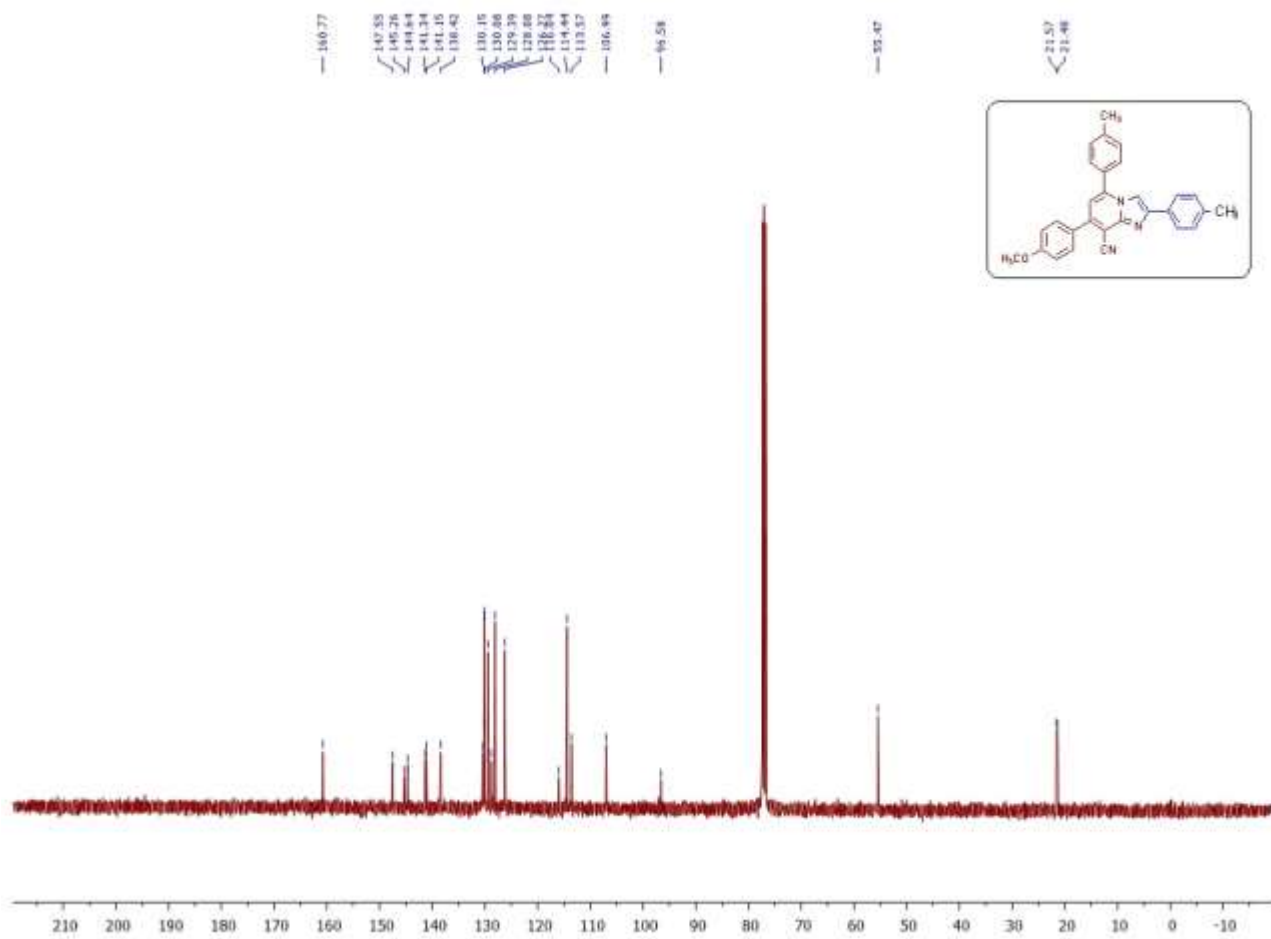

**Figure S5:**  $^{13}\text{C}$  NMR of SS2.

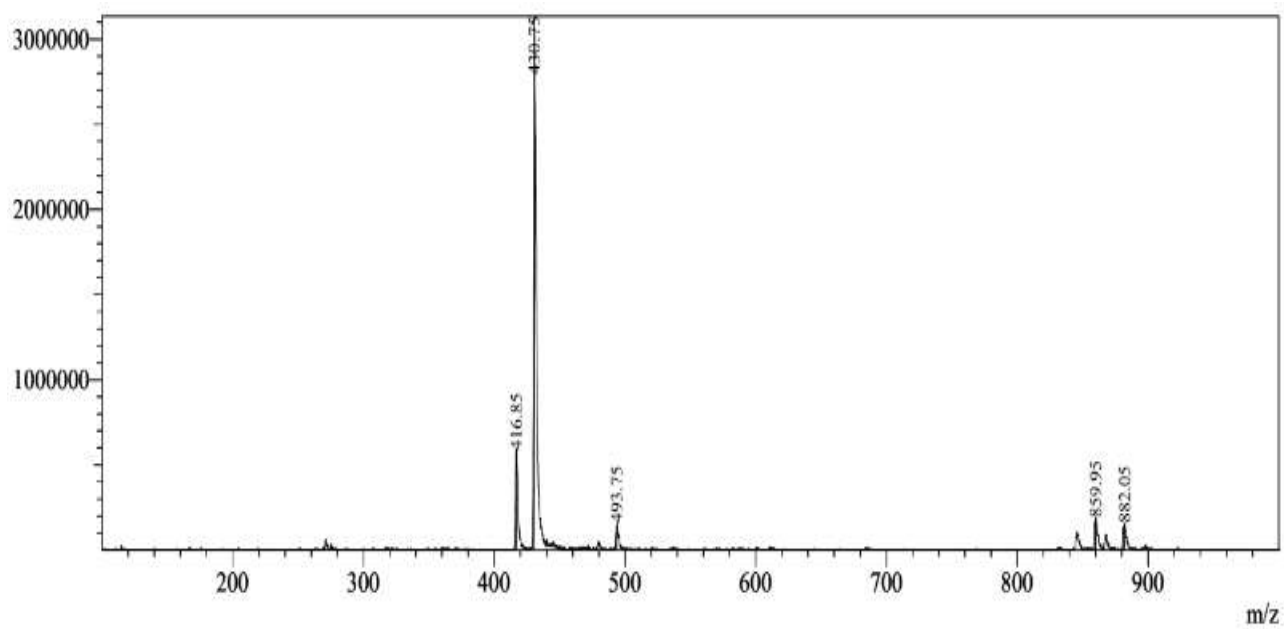

**Figure S6:** Mass spectra of **SS2**.

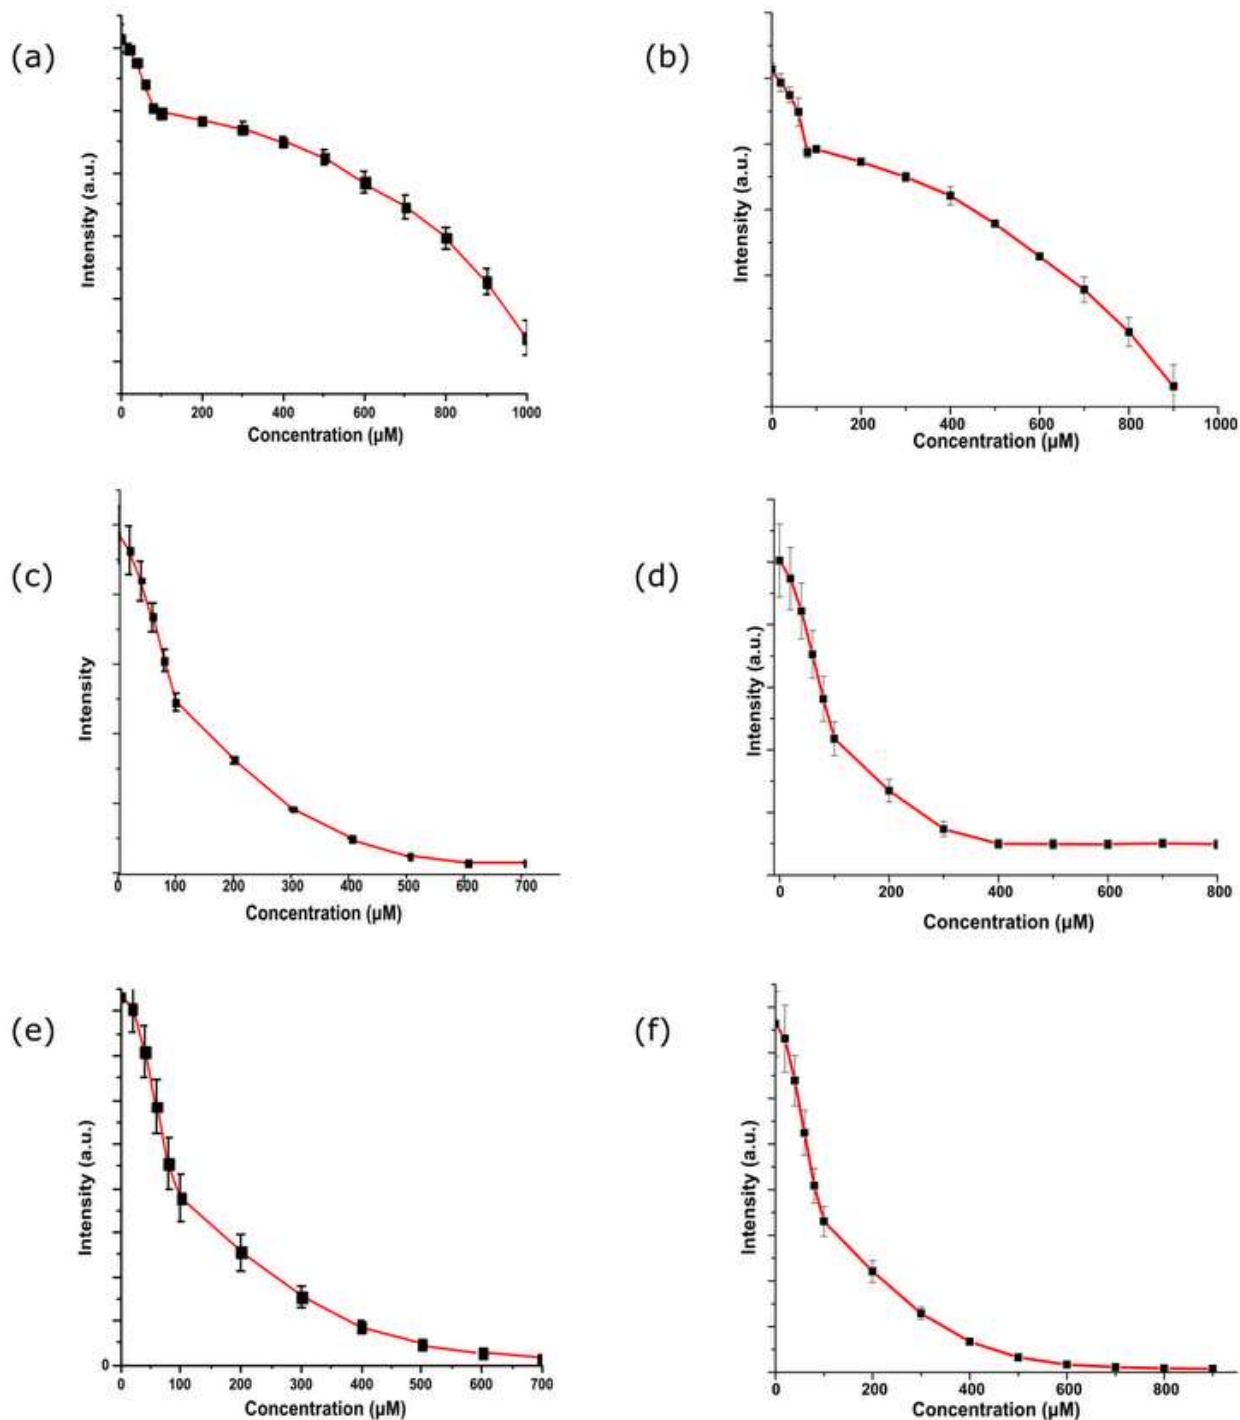

**Figure S7:** (a) Variation in the intensity of emission band of SS1 (10  $\mu\text{M}$  at 470 nm on the incremental addition of  $\text{Cu}^{2+}$  ions (0-100 equiv) in THF/water (7:3, v/v) solution; (b) Variation in the intensity of emission band of SS2 (10  $\mu\text{M}$  at 470 nm on the incremental addition of  $\text{Cu}^{2+}$  ions (0-90 equiv) in THF/water (7:3, v/v) solution; (c) Variation in the intensity of emission band of SS1 (10  $\mu\text{M}$  at 470 nm on the incremental addition of  $\text{Fe}^{2+}$  ions (0-70 equiv) in THF/water (7:3, v/v) solution; (d) Variation in the intensity of emission band of SS2 (10  $\mu\text{M}$  at 470 nm on the incremental addition of  $\text{Fe}^{2+}$  ions (0-100 equiv) in THF/water (7:3, v/v) solution; (e) Variation in the intensity of emission band of SS1 (10  $\mu\text{M}$  at 470 nm on the incremental addition of  $\text{Fe}^{3+}$  ions (0-70 equiv) in THF/water (7:3, v/v) solution; (f) Variation in the intensity of emission band of SS2 (10  $\mu\text{M}$  at 470 nm on the incremental addition of  $\text{Fe}^{3+}$  ions (0-80 equiv) in THF/water (7:3, v/v) solution.



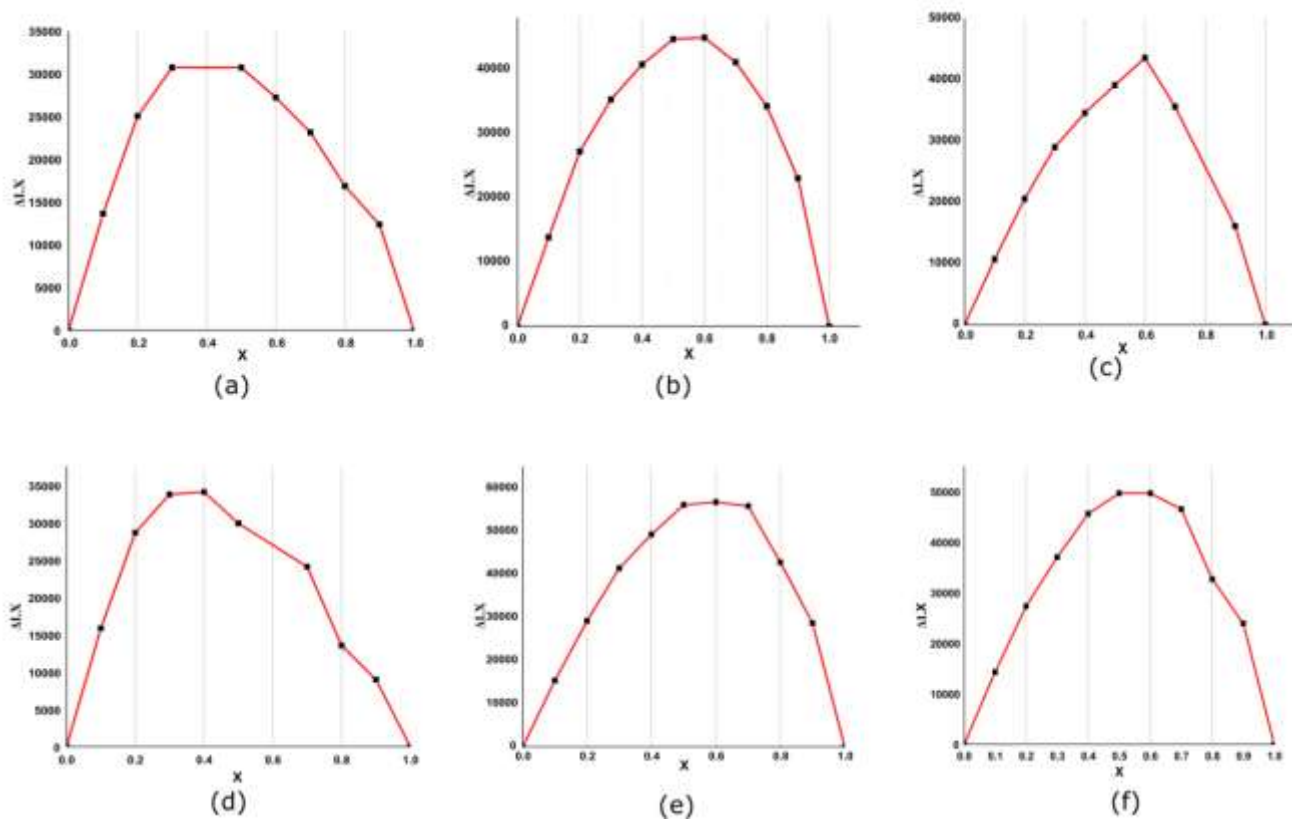

**Figure S8:** (a-c) Job's plot of SS1 with  $\text{Cu}^{2+}$ ,  $\text{Fe}^{2+}$ , and  $\text{Fe}^{3+}$  using the emission at 470 nm and (d-f) Job's plot of SS2 with  $\text{Cu}^{2+}$ ,  $\text{Fe}^{2+}$ , and  $\text{Fe}^{3+}$  and using the emission at 470 nm.

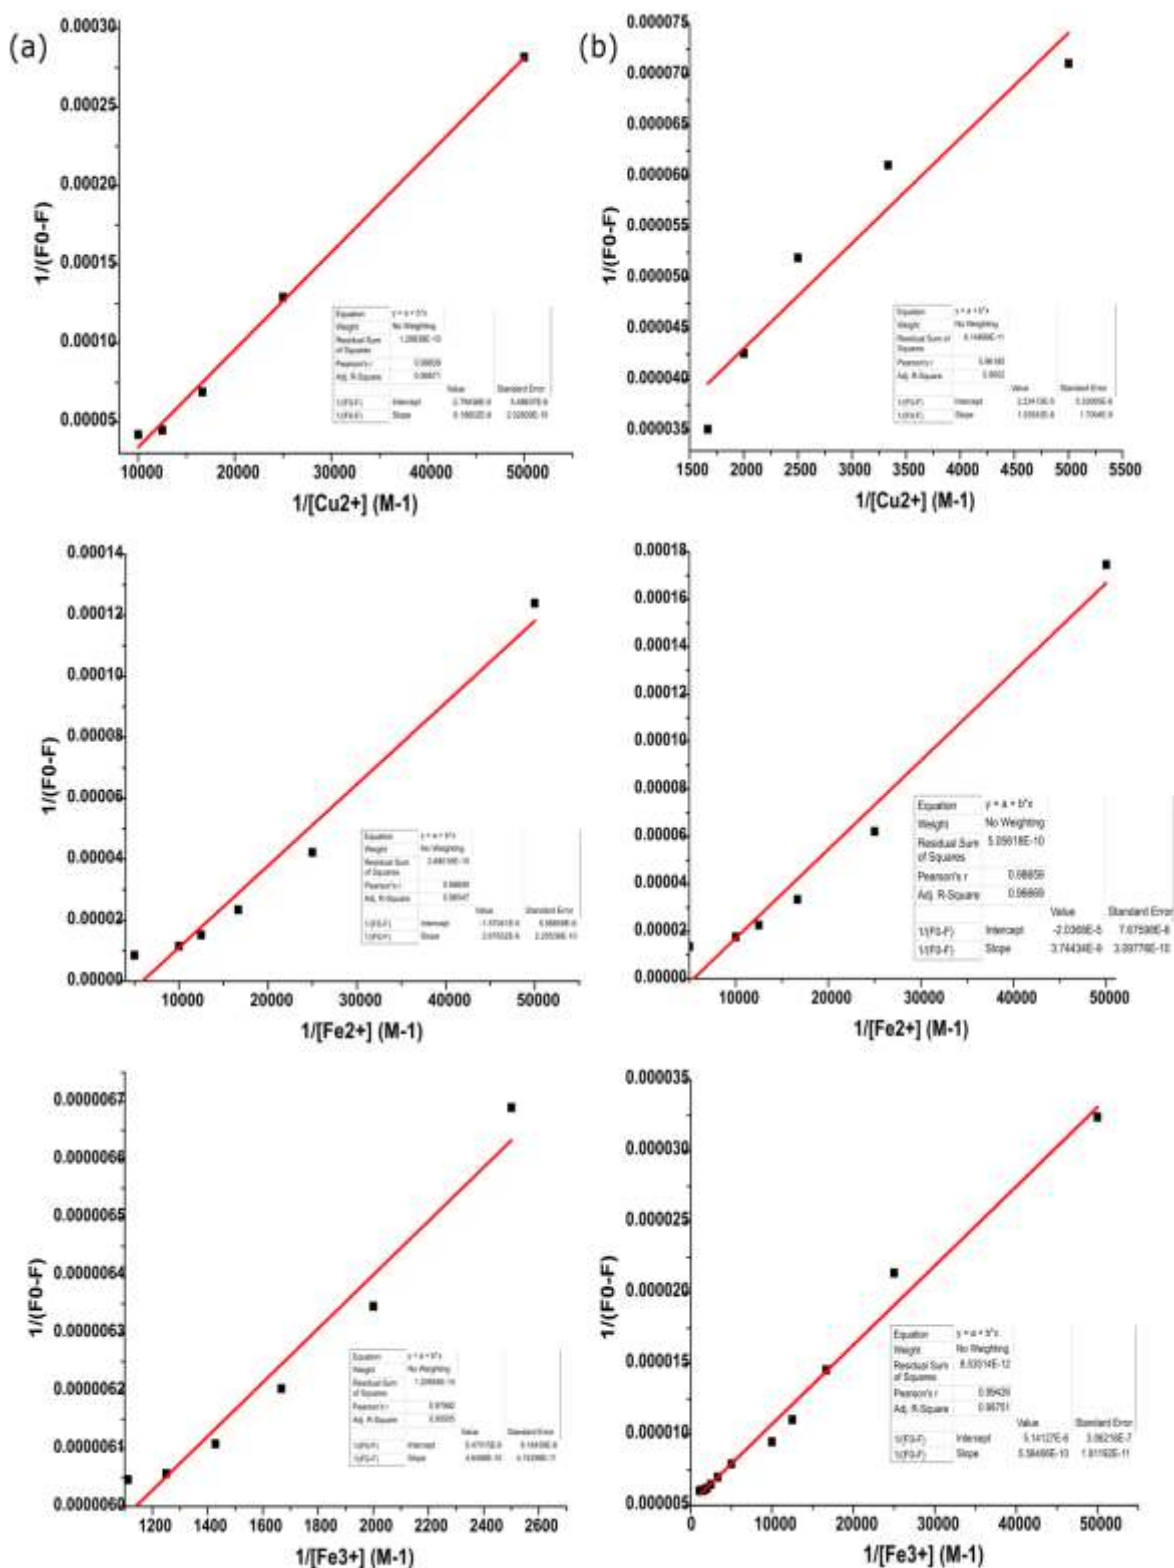

**Figure S9:** (a) Benesi- Hildebrand plot of SS1 (10 μM) with Fe<sup>3+</sup>, Fe<sup>2+</sup>, and Cu<sup>2+</sup> (0-100 equiv.) using the emission at 470 nm and (b) Benesi- Hildebrand plot of SS2 (10 μM) with Fe<sup>3+</sup>, Fe<sup>2+</sup>, and Cu<sup>2+</sup> (0-100 equiv.) using the emission at 470 nm.

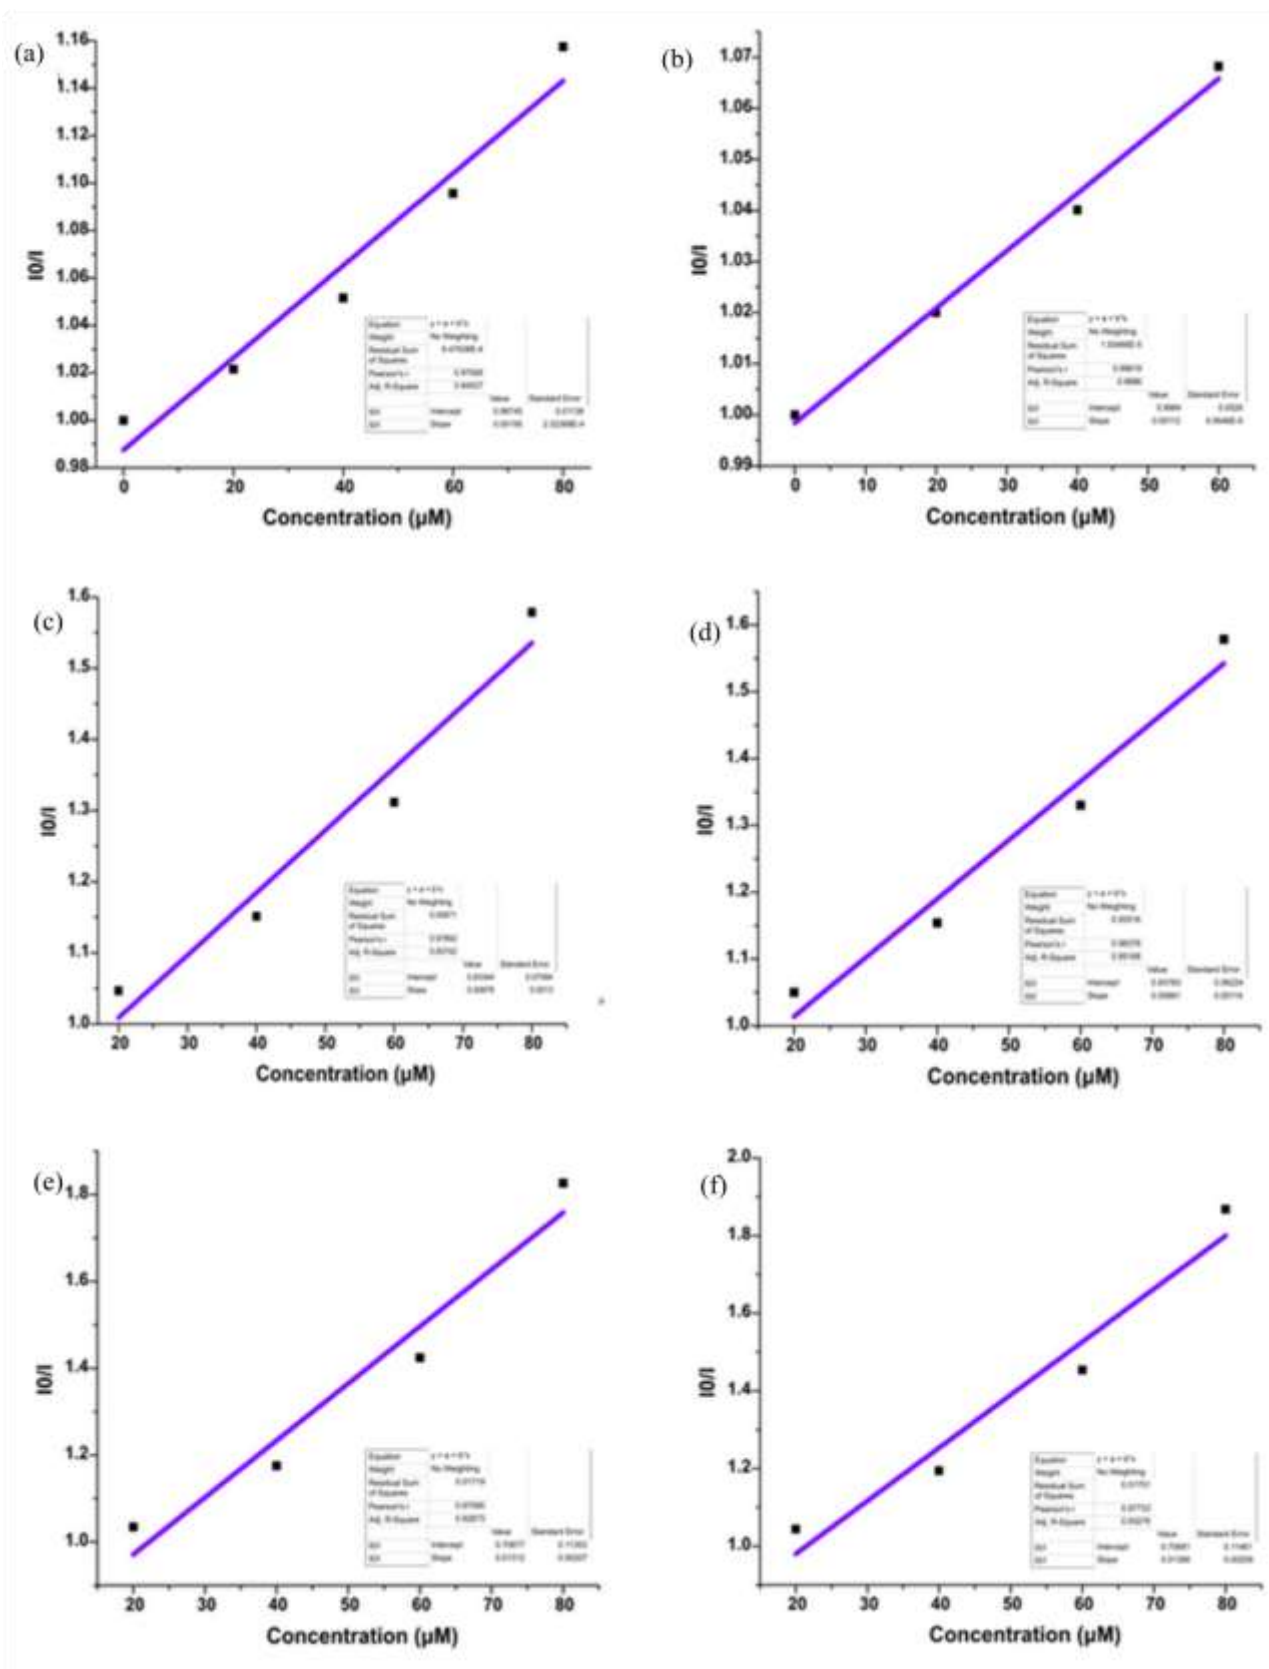

**Figure S10:** Stern-Volmer plots of SS1 with  $\text{Cu}^{2+}$ ,  $\text{Fe}^{2+}$ , and  $\text{Fe}^{3+}$  (a-c) and SS2 with  $\text{Cu}^{2+}$ ,  $\text{Fe}^{2+}$ , and  $\text{Fe}^{3+}$  (d-f) at 470 nm.

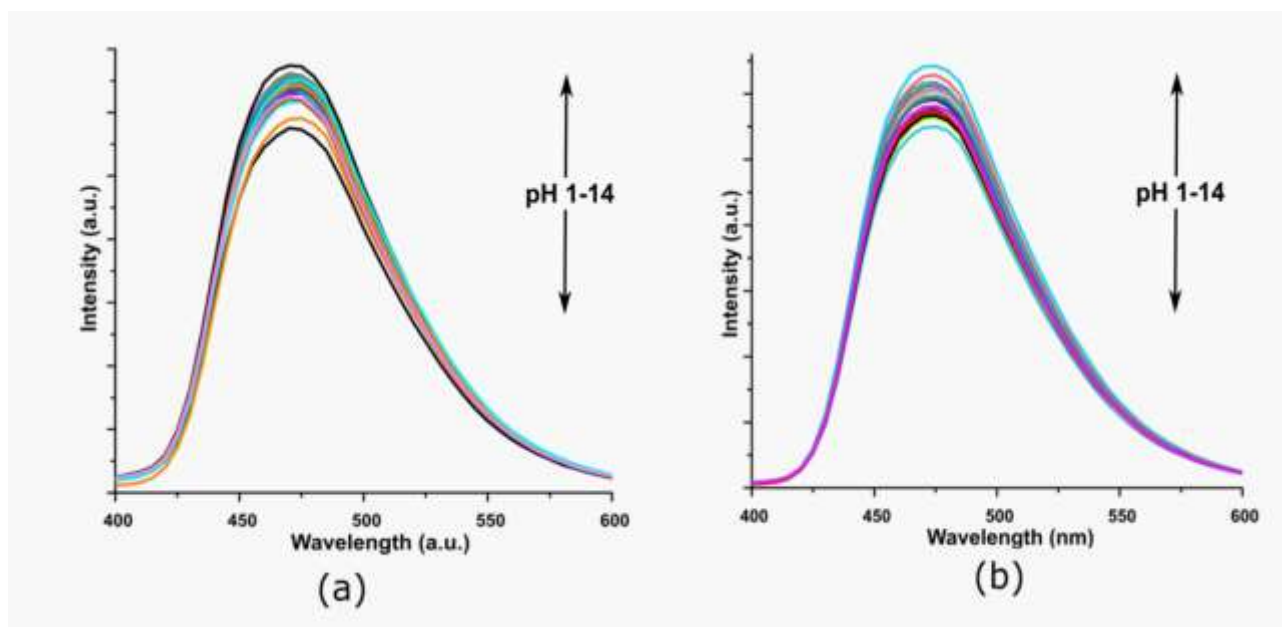

**Figure S11:** Fluorescence response of (a) SS1 and (b) SS2 as a function of pH.
